# Supplementary material for: Vaccine vectors based on Adenovirus 19a/64 exhibit broad cellular tropism and potently restimulate HCMV-specific T cell responses ex vivo
Source: PubMed Central journal article supplement (PMC5784015; doi:10.1038/s41598-018-19874-1), 2018-01-24
Supplement: 41598_2018_19874_MOESM1_ESM.pdf [file 41598_2018_19874_MOESM1_ESM.pdf]

## Supplementary information

### Vaccine vectors based on Adenovirus 19a/64 exhibit broad cellular tropism and potently restimulate HCMV-specific T cell responses ex vivo

Richard Kiener<sup>1</sup>, Markus Fleischmann<sup>1</sup>, Christiane Schwegler<sup>1</sup>, Zsolt Ruzsics<sup>3</sup>, Christian Thirion<sup>2</sup>, Silke Schrödel<sup>2</sup>, Benedikt Asbach<sup>1</sup>, Ralf Wagner<sup>1,4\*</sup>

<sup>1</sup> Institute of Medical Microbiology and Hygiene, Universität Regensburg, Franz-Josef-Strauß-Allee 11, 93053 Regensburg, Germany

<sup>2</sup> SIRION Biotech GmbH, Am Klopferspitz 19, 82152, Martinsried, Germany

<sup>3</sup> Institute of Virology, Medical Center – University of Freiburg, Medical Faculty, University of Freiburg, Hermann-Herder Str 11, 79104 Freiburg, Germany

<sup>4</sup> Institute of Clinical Microbiology and Hygiene, University Hospital Regensburg, Franz-Josef- Strauß-Allee 11, 93053 Regensburg, Germany

\* corresponding author: Prof. Dr. Ralf Wagner, Molecular Microbiology (Virology), Institute of Medical Microbiology and Hygiene, Franz-Josef-Strauss-Allee 11, University of Regensburg, 93053 Regensburg

phone: +49 941 944 6452, fax: +49 941 944 6484

email: ralf.wagner@klinik.uni-regensburg.de

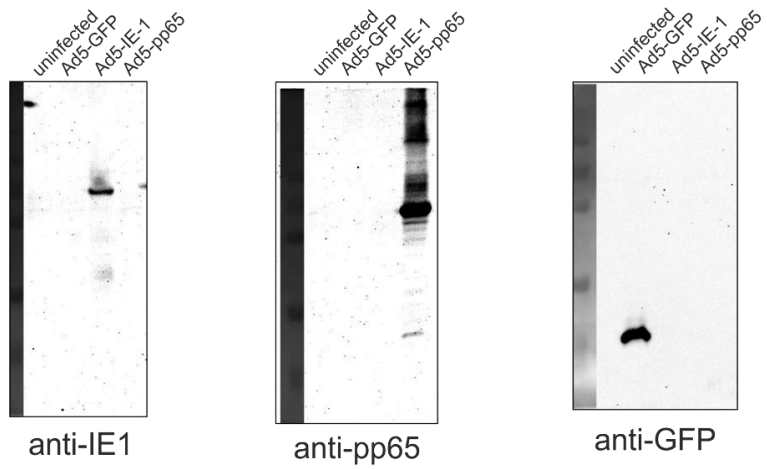

**Supplementary Figure 1** Western Blot analysis of transgene expression 48 hours post infection (hpi). Cropped parts of these blots are displayed in Figure 1A. HEK293T cells were infected at a multiplicity of infection (MOI) of 10 with Ad5 or Ad19a/64 vectors expressing the genes IE-1, pp65, or GFP as indicated.

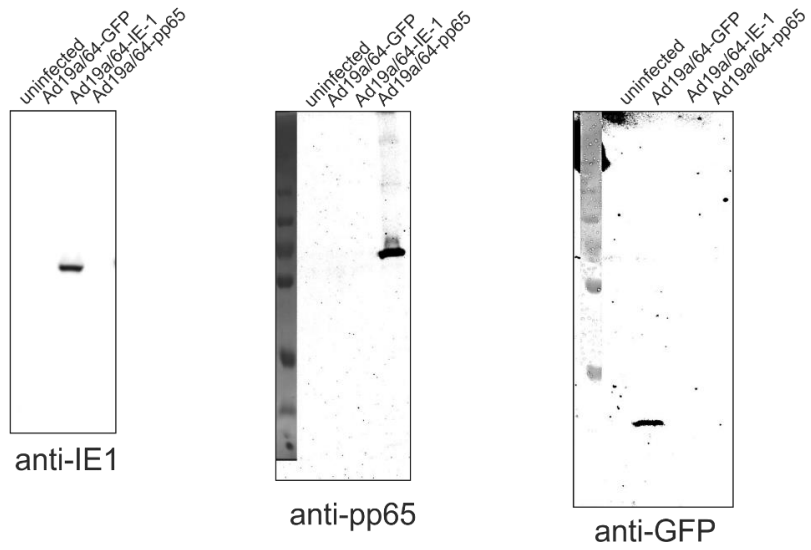

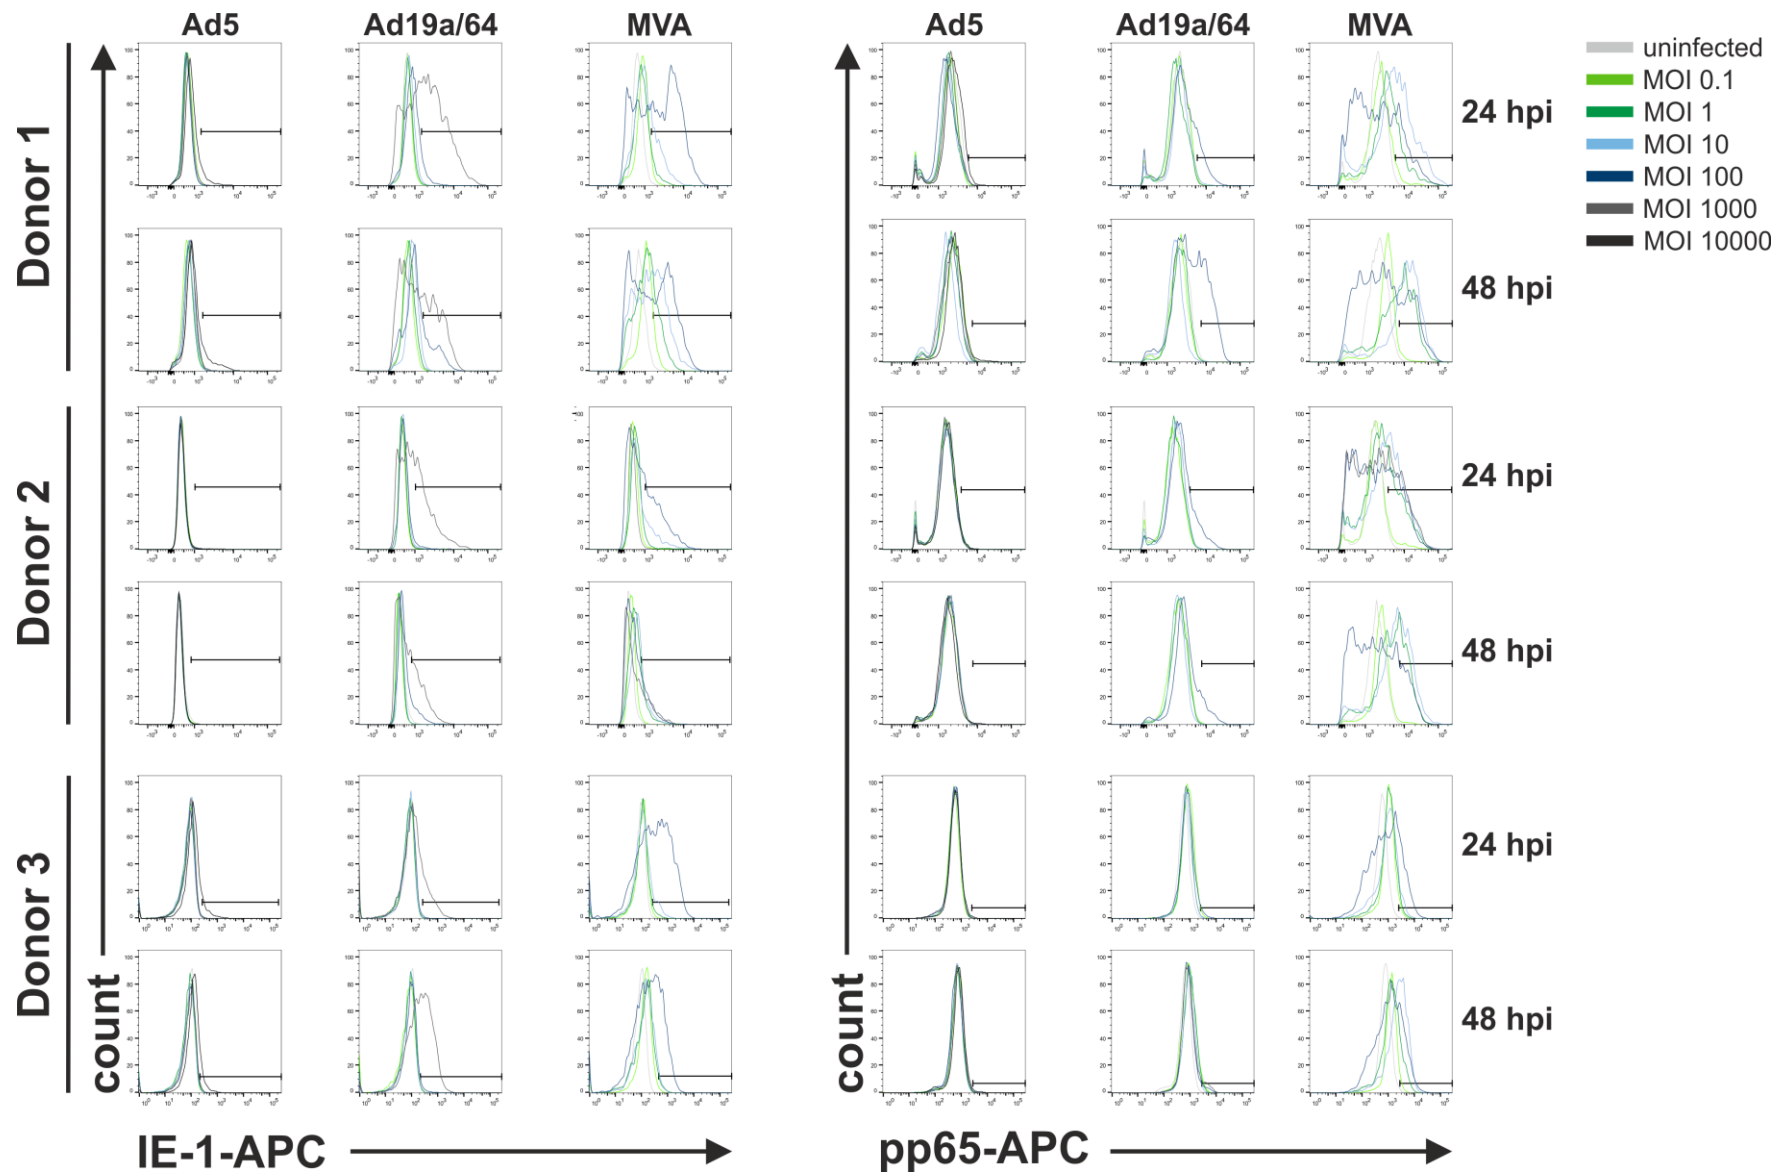

**Supplementary Figure 2** MoDCs from 3 different HCMV seronegative blood donors were infected at the indicated MOIs with IE-1- or pp65-expressing vectors and transgene expression was analyzed at the indicated time points via flow cytometry after intracellular antigen staining. The gating was performed as shown in figure 3.
